# Supplementary material
Source: PubMed Central journal article supplement (PMC5644974)
Supplement: EHP504.s001.acco.pdf [file EHP504.s001.acco.pdf]

**Note to readers with disabilities:** *EHP* strives to ensure that all journal content is accessible to all readers. However, some figures and Supplemental Material published in *EHP* articles may not conform to [508 standards](#) due to the complexity of the information being presented. If you need assistance accessing journal content, please contact [ehp508@niehs.nih.gov](mailto:ehp508@niehs.nih.gov). Our staff will work with you to assess and meet your accessibility needs within 3 working days.

## **Supplemental Material**

### **Prenatal Residential Proximity to Agricultural Pesticide Use and IQ in 7-Year-Old Children**

Robert B. Gunier, Asa Bradman, Kim G. Harley, Katherine Kogut, and Brenda Eskenazi

#### **Table of Contents**

**Table S1.** Pesticide use (kg) in Monterey County in 2000, relative potency factors and toxicity-weighted pesticide use.

**Table S2.** Correlation coefficients between agricultural use (kg) of neurotoxic pesticide groups within one kilometer of maternal residence during pregnancy (n=283).

**Table S3.** Adjusted association between a standard deviation increase in pesticide use (kg) within one kilometer of maternal residence during pregnancy and Full-Scale IQ at 7-years of age (n=255) from multiple pesticide models.

#### **References**

Table S1. Pesticide use (kg) in Monterey County in 2000, relative potency factors and toxicity-weighted pesticide use.

| Pesticide              | Pesticide Use (kg)<br>Monterey 2000 | Relative Potency<br>Factor <sup>a</sup> | Toxicity Weighted<br>Use Monterey 2000 |
|------------------------|-------------------------------------|-----------------------------------------|----------------------------------------|
| Organophosphates (OPs) |                                     |                                         |                                        |
| Acephate               | 34,792                              | 1.95                                    | 67,777                                 |
| Azinphos-methyl        | 100                                 | 1.32                                    | 131                                    |
| Bensulide              | 19,346                              | 0.04                                    | 710                                    |
| Chlorpyrifos           | 25,357                              | 1.00                                    | 25,357                                 |
| Diazinon               | 56,434                              | 0.16                                    | 8,800                                  |
| Dimethoate             | 17,500                              | 4.29                                    | 75,000                                 |
| Disulfoton             | 5,976                               | 15.00                                   | 89,639                                 |
| Ethoprop               | 568                                 | 1.11                                    | 631                                    |
| Fenamiphos             | 1,253                               | 0.87                                    | 1,087                                  |
| Malathion              | 37,161                              | 0.01                                    | 263                                    |
| Methamidophos          | 965                                 | 21.43                                   | 20,671                                 |
| Methidathion           | 6,942                               | 6.25                                    | 43,385                                 |
| Naled                  | 9,492                               | 1.50                                    | 14,238                                 |
| Oxydemeton-methyl      | 28,767                              | 21.43                                   | 616,426                                |
| Phosmet                | 45                                  | 0.36                                    | 16                                     |
| Total OPs              | 244,696                             | -                                       | 964,130                                |
| Carbamates             |                                     |                                         |                                        |
| Carbaryl               | 7,011                               | 1.24                                    | 8,691                                  |
| Carbofuran             | 8,868                               | 15.00                                   | 133,023                                |
| Methiocarb             | 131                                 | 1.15                                    | 150                                    |
| Methomyl               | 37,884                              | 4.17                                    | 157,851                                |
| Oxamyl                 | 3,530                               | 6.25                                    | 22,060                                 |
| Thiodicarb             | 2,490                               | 5.56                                    | 13,835                                 |
| Total Carbamates       | 59,914                              | -                                       | 335,611                                |

<sup>a</sup> Relative potency factors are based on male rat brain cholinesterase activity with chlorpyrifos as the index chemical (USEPA 2006; USEPA 2007).

Table S2. Correlation coefficients between agricultural use (kg) of neurotoxic pesticide groups within one kilometer of maternal residence during pregnancy (n=283).

|                      | Organophosphates | Carbamates | Manganese-fungicides | Pyrethroids |
|----------------------|------------------|------------|----------------------|-------------|
| Organophosphates     | 1.00             |            |                      |             |
| Carbamates           | 0.82             | 1.00       |                      |             |
| Manganese-fungicides | 0.90             | 0.73       | 1.00                 |             |
| Pyrethroids          | 0.82             | 0.68       | 0.79                 | 1.00        |
| Neonicotinoids       | 0.77             | 0.71       | 0.81                 | 0.78        |

p<0.001 for all correlations.

Table S3. Adjusted<sup>a</sup> association between a standard deviation increase in pesticide use (kg) within one kilometer of maternal residence during pregnancy and Full-Scale IQ at 7-years of age (n=255) from multiple pesticide models.

| Neurotoxic Pesticides                 | $\beta$ | (95% CI)     |
|---------------------------------------|---------|--------------|
| Model 1 - Organophosphates            |         |              |
| Acephate                              | -0.6    | (-4.8, 3.6)  |
| Chlorpyrifos                          | 2.3     | (-1.3, 5.8)  |
| Diazinon                              | 0.3     | (-2.2, 2.9)  |
| Malathion                             | 0.2     | (-1.7, 2.1)  |
| Oxydemeton-methyl                     | -4.2    | (-10.1, 1.8) |
| Model 2 - Neurotoxic pesticide groups |         |              |
| Organophosphates toxicity weighted    | -2.8    | (-6.8, 1.3)  |
| Carbamates toxicity weighted          | 1.2     | (-1.6, 4.0)  |
| Neonicotinoids                        | -0.5    | (-3.8, 2.7)  |
| Pyrethroids                           | -1.2    | (-4.3, 1.9)  |
| Mn-fungicides                         | 1.0     | (-3.5, 5.4)  |

<sup>a</sup> Adjusted for child's age at assessment, sex, language of assessment, maternal education, maternal intelligence, maternal country of birth, maternal depression at 7-year visit, HOME Score at 7-year visit, household poverty level at 7-year visit and prenatal urinary DAPs.

## **References**

- USEPA (United States Environmental Protection Agency). 2006. Organophosphorous Cumulative Risk Assessment - 2006 Update. Washington, D.C.
- USEPA. 2007. Revised N-Methyl Carbamate Cumulative Risk Assessment. Washington, D.C.
